# Supplementary material for: The severity of MUSK pathogenic variants is predicted by the protein domain they disrupt
Source: PubMed Central journal article supplement — HGG Adv. 2024 Apr 1;5(3):100288. doi: 10.1016/j.xhgg.2024.100288 (PMC11070630; doi:10.1016/j.xhgg.2024.100288), 2024-04-01
Supplement: mmc1.pdf [file mmc1.pdf]

**HGGA, Volume 5**

**Supplemental information**

**The severity of *MUSK* pathogenic variants  
is predicted by the protein domain they disrupt**

**Benjamin T. Cocanougher, Samuel W. Liu, Ludmila Francescato, Alexander Behura, Mariele Anneling, David G. Jackson, Kristen L. Deak, Chi D. Hornik, Mai K. ElMallah, Carolyn E. Pizoli, Edward C. Smith, Khoon Ghee Queenie Tan, and Marie T. McDonald**

Heterozygous variants observed in patients involving the Ig1 domain

| Variant effect  | Loss of protein                  | Loss of Ig1 domain          | Loss of Ig1 domain          | Missense in Ig1 | Frameshift      | Missense in Ig1 | Frameshift        | Missense in Ig1 | Loss of protein       | Missense in Ig1 |
|-----------------|----------------------------------|-----------------------------|-----------------------------|-----------------|-----------------|-----------------|-------------------|-----------------|-----------------------|-----------------|
|                 |                                  |                             |                             |                 |                 |                 |                   |                 |                       |                 |
| DNA changes     | out of frame deletion exons 7-11 | in frame deletion exons 2-3 | in frame deletion exons 2-3 | c.114T>A        | c.421delC       | c.220C>T        | c.790C>T          | c.296G>T        | c.496C>T              | c.308A>G        |
| Protein changes |                                  |                             |                             | p.D38E          | p.141fs         | p.R74W          | p.R264*           | p.C99F          | p.166*                | p.N103S         |
| Phenotype       | CMS                              |                             | CMS                         |                 | FADS            |                 | FADS              |                 | CMS                   |                 |
| Onset           | Neonatal                         |                             | Infantile                   |                 | fetal           |                 | Fetal             |                 | Neonatal              |                 |
| Reference       | this paper                       |                             | Gallenmüller et al., 2019   |                 | Li et al., 2019 |                 | Ding et al., 2020 |                 | Giarrana et al., 2015 |                 |

**Supplemental Figure 1: Compound heterozygous allele combinations with missense variants in the Ig1 domain.** Five allele combinations in compound heterozygosity involve the Ig1 domain. They all result in fetal or neonatal presentation, with the exception of the p.N103S which has a variable presentation (observed as neonatal, infantile, adolescent, and adult). Two cases have been reported with the in-frame deletion of Ig1. The p.R74W and p.C99F allele, when in combination with a null allele, result in FADS. The p.N103s allele is the most variable and most common pathogenic allele observed in the cohort.

## Compound heterozygous variants observed in patients with biallelic missense variants in the kinase domain

|                 | Allele 1                                                                          | Allele 2                                                                          |                                                                                   |                                                                                   |                                                                                     |                                                                                     |
|-----------------|-----------------------------------------------------------------------------------|-----------------------------------------------------------------------------------|-----------------------------------------------------------------------------------|-----------------------------------------------------------------------------------|-------------------------------------------------------------------------------------|-------------------------------------------------------------------------------------|
| Variant effect  | Missense in kinase domain                                                           | Missense in kinase domain                                                           |
|                 |  |  |  |  |  |  |
| DNA changes     | c.1815G>A                                                                         | c.2180C>T                                                                         | c.1948C>A                                                                         | c.2384T>G                                                                         | c.2365G>A                                                                           | c.2180C>T                                                                           |
| Protein changes | p.M605I                                                                           | p.A727V                                                                           | p.P650T                                                                           | p.I795S                                                                           | p.V790M                                                                             | p.A727V                                                                             |
| Phenotype       | CMS                                                                               |                                                                                   | CMS                                                                               |                                                                                   | CMS                                                                                 |                                                                                     |
| Onset           | Neonatal                                                                          |                                                                                   | Childhood                                                                         |                                                                                   | Adolescence                                                                         |                                                                                     |
| Reference       | Maselli et al., 2010                                                              |                                                                                   | Luan, Tian, and Cao 2016                                                          |                                                                                   | Owen et al., 2018                                                                   |                                                                                     |

**Supplemental Figure 2: Compound heterozygous allele combinations with missense variants in the kinase domain.** Three combinations of variants were observed with two separate missense variants in the kinase domain. The p.A727V appeared in both a neonatal case in combination with p.M605I and an adolescent case with p.V790M, suggesting that either (1) the p.M605I is a more severe variant or (2) additional genetic or environmental modifiers were present in the patients reported. The p.V790M, when paired with a null allele, leads to neonatal onset CMS (Supplemental Figure 3).

### Heterozygous variants observed in patients with one loss of MuSK and one missense variant in the kinase domain

|                 | Allele 1           | Allele 2                  |  | Allele 1                | Allele 2                  |  | Allele 1                               | Allele 2                  |  | Allele 1                 | Allele 2                  |
|-----------------|--------------------|---------------------------|--|-------------------------|---------------------------|--|----------------------------------------|---------------------------|--|--------------------------|---------------------------|
| Variant effect  | Frameshift         | Missense in kinase domain |  | Frameshift              | Missense in kinase domain |  | Splice site disruption                 | Missense in kinase domain |  | Truncating before kinase | Missense in kinase domain |
|                 |                    |                           |  |                         |                           |  |                                        |                           |  |                          |                           |
| DNA changes     | c.497delA          | c.2365G>A                 |  | c.220insC               | c.2365G>A                 |  | c.79+2T>G                              | c.2158A>G                 |  | c.2062C>T                | c.2324T>C                 |
| Protein changes | p.K156Rfs*20       | p.V790M                   |  | p.R75fs*                | p.V790M                   |  | p.?                                    | p.K720E                   |  | p.Q688X                  | p.F775S                   |
| Phenotype       | CMS                |                           |  | CMS                     |                           |  | CMS                                    |                           |  | CMS                      |                           |
| Onset           | Neonatal           |                           |  | Neonatal                |                           |  | Neonatal                               |                           |  | Neonatal                 |                           |
| Reference       | Maggi et al., 2013 |                           |  | Chevessier et al., 2004 |                           |  | Al-Shahoumi et al., 2015               |                           |  | Shen et al., 2020        |                           |
| Variant effect  | Frameshift         | Missense in kinase domain |  | Truncating after kinase | Missense in kinase domain |  | Splice site disruption                 | Missense in kinase domain |  |                          |                           |
|                 |                    |                           |  |                         |                           |  |                                        |                           |  |                          |                           |
| DNA changes     | c.496C>T           | c.1634T>C                 |  | c.2446C>T               | c.2887G>A                 |  | c.79+2T>G                              | c.2165T>C                 |  |                          |                           |
| Protein changes | p.R166*            | p.L545P                   |  | p.R816*                 | p.A763T                   |  | p.?                                    | p.V722A                   |  |                          |                           |
| Phenotype       | CMS                |                           |  | CMS                     |                           |  | CMS                                    |                           |  |                          |                           |
| Onset           | Adult              |                           |  | CVCP                    |                           |  | CVCP, adult onset limb-girdle weakness |                           |  |                          |                           |
| Reference       | Owen et al., 2018  |                           |  | Murali et al., 2019     |                           |  | Pinto et al., 2019                     |                           |  |                          |                           |

### Supplemental Figure 3: Compound heterozygous allele combinations with one null and one

**missense variant.** The most common allele class observed in compound heterozygous patients is one null and one missense allele (11/15 observations). Patients with one null allele and one kinase missense variant had variable phenotypes from neonatal CMS to isolated CVCP. Even residues that are very close in space (p.V722A and p.K720E) had disparate clinical presentations.

| Gene           | DNA change          | Protein change       | Zygosity     | dbSNP rsID   | Variant interpretation                        | Related Disease (inheritance)       |
|----------------|---------------------|----------------------|--------------|--------------|-----------------------------------------------|-------------------------------------|
| <b>MUSK</b>    | Deletion exons 7-11 | Premature stop codon | Heterozygous | N/A          | Pathogenic (maternally inherited)             | Congenital Myasthenic Syndrome (AR) |
| <b>MUSK</b>    | Deletion exons 2-3  | In frame             | Heterozygous | N/A          | Pathogenic (paternally inherited)             | Congenital Myasthenic Syndrome (AR) |
| <b>MUSK</b>    | c.667G>A            | p.Val223Ile          | Heterozygous | rs774463260  | Uncertain significance (paternally inherited) | Congenital Myasthenic Syndrome (AR) |
| <b>CHRND</b>   | c.68A>T             | p.Asn23Ile           | Heterozygous | Not reported | Uncertain significance                        | Congenital Myasthenic Syndrome (AR) |
| <b>HNRNPDL</b> | c.273A>G            | Silent mutation      | Heterozygous | rs372961029  | Uncertain significance                        | Limb girdle muscular dystrophy (AD) |
| <b>SPEG</b>    | c.3017G>A           | p.Arg1006His         | Heterozygous | rs571127512  | Uncertain significance                        | Centronuclear myopathy (AR)         |
| <b>GAA</b>     | c.2065G>A           | p.Glu689Lys          | Heterozygous | rs1800309    | Benign (Pseudodeficiency allele)              | Pompe Disease (AR)                  |

**Supplemental Table 1:** Results from a comprehensive neuromuscular panel revealed two pathogenic variants in *MUSK*, four variants of uncertain significance, and a benign pseudodeficiency allele in *GAA* were detected. This result is consistent with a diagnosis of *MUSK*-related CMS.
